# Supplementary material
Source: PubMed Central journal article supplement (PMC5047108)
Supplement: supp_pp.16.01026_PP2016-01026DR2_Supplemental_Figure_S1.pdf [file supp_pp.16.01026_PP2016-01026DR2_Supplemental_Figure_S1.pdf]

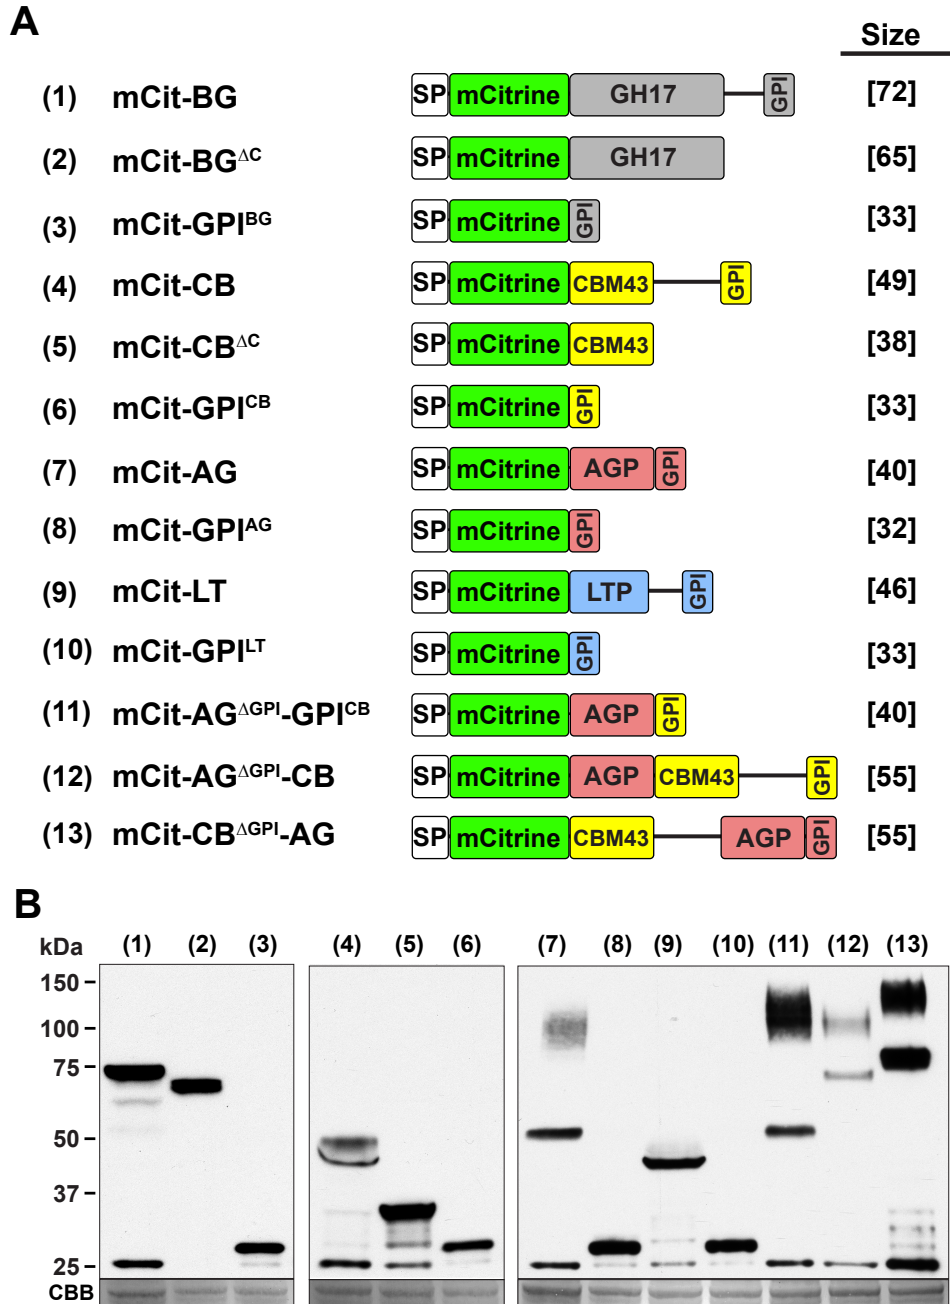

**Supplemental Figure S1.** A western blot analysis of the fusion proteins characterized in this study. **A**, Diagrams of SP-mCitrine fusions of the proteins and their theoretical sizes in kDa (Size). **B**, Western blot analysis of the fusion proteins listed in A. Total protein was extracted from transiently expressed proteins in *N. benthamiana*, subjected to SDS-PAGE and probed with  $\alpha$ -GFP antibody. Since AGP4 is a proteoglycan, all AGP4-containing fusions (#7, 11, 12 and 13) migrate at higher molecular weight than the theoretical polypeptide size, and show an additional high-molecular weight smear-like band, characteristic of glycosylated proteins. Asterisk in B indicate the band corresponding to a free mCitrine. Equal loading was confirmed by coomassie brilliant blue staining, CBB.
