# Supplementary material
Source: PubMed Central journal article supplement (PMC5047108)
Supplement: supp_pp.16.01026_PP2016-01026DR2_Supplemental_Figure_S2.pdf [file supp_pp.16.01026_PP2016-01026DR2_Supplemental_Figure_S2.pdf]

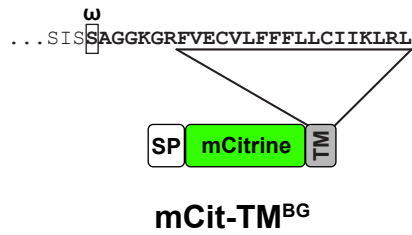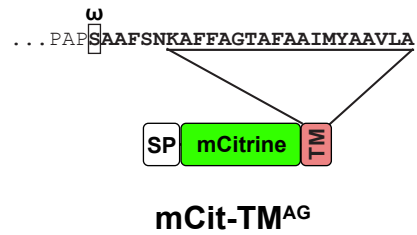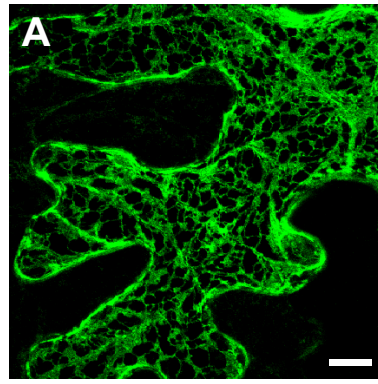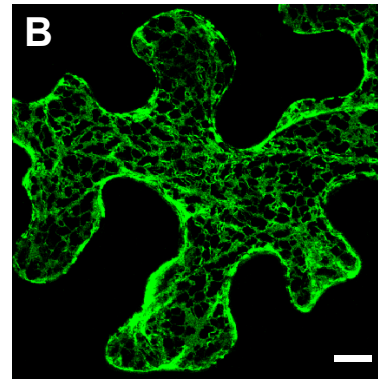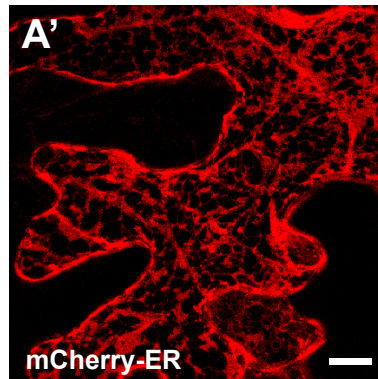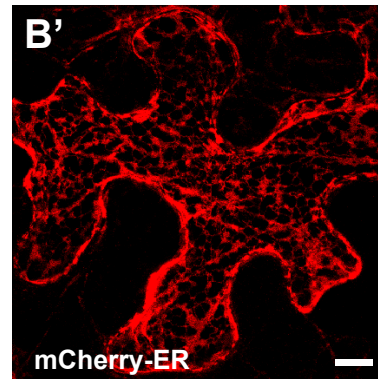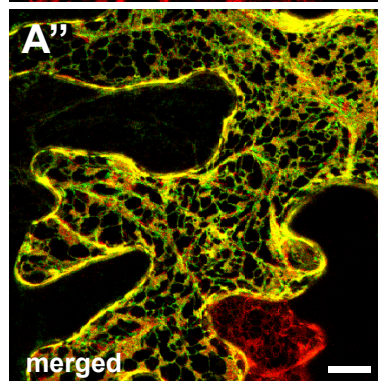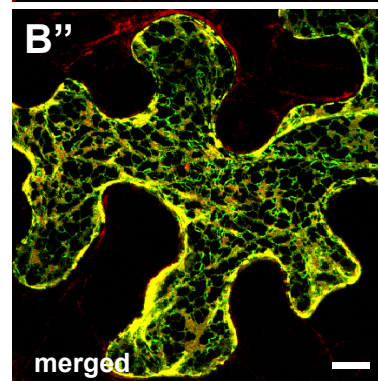

**Supplemental Figure S2.** Localization of SP-mCitrine fused to the transmembrane (TM) segment of the GPI signal in transient expression in *N. benthamiana*. **A-B''**, Co-localization of mCherry-ER with SP-mCitrine fused to the predicted TM segment of the C-terminal GPI signal of BG<sub>pap</sub> (mCit-TM<sup>BG</sup>) (A-A'') and AGP4 (mCit-TM<sup>AG</sup>) (B-B''). Diagrams of the fusion proteins and sequence of the TM segment are shown above. Images are Z-projections of several confocal slices. Bars = 10 $\mu$ m.
