# Supplementary material
Source: PubMed Central journal article supplement (PMC5047108)
Supplement: supp_pp.16.01026_PP2016-01026DR2_Supplemental_Figure_S3.pdf [file supp_pp.16.01026_PP2016-01026DR2_Supplemental_Figure_S3.pdf]

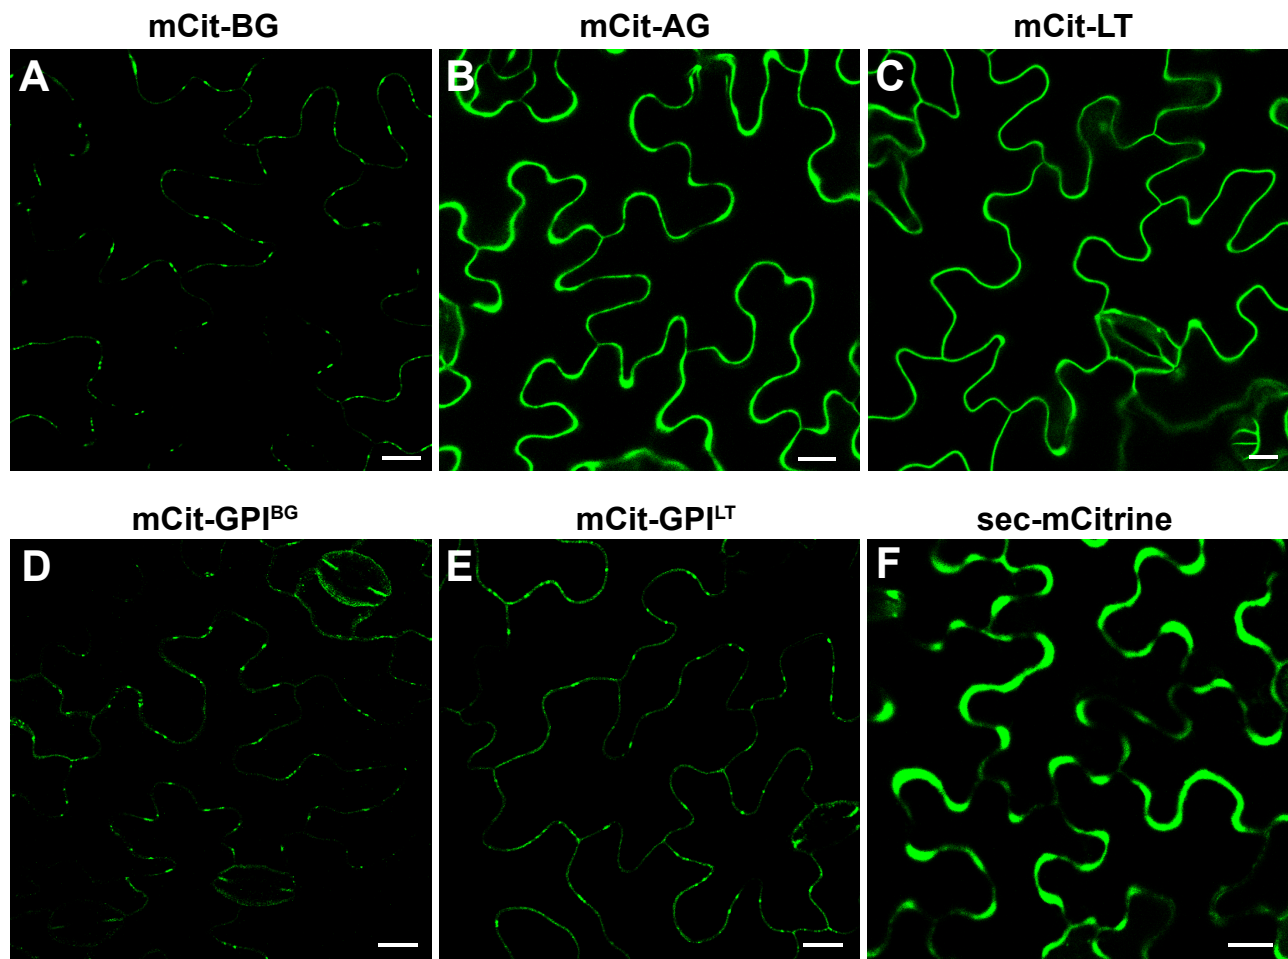

**Supplemental Figure S3.** Localization of Pd- and non-Pd GPI-APs in transgenic Arabidopsis. **A-C**, Localization of SP-mCitrine fused to full-length BG\_pap (mCit-BG) (A), AGP4 (mCit-AG) (B), and LTPG1 (mCit-LT) (C). **D-E**, Localization of SP-mCitrine fused to GPI signals of BG\_pap (mCit-GPI<sup>BG</sup>) (D) and LTPG1 (mCit-GPI<sup>LT</sup>) (E). **F**, Localization of a control fusion secreted mCitrine (sec-mCitrine). Bars = 10μm.
