# Supplementary material
Source: PubMed Central journal article supplement (PMC5047108)
Supplement: supp_pp.16.01026_PP2016-01026DR2_Supplemental_Figure_S4.pdf [file supp_pp.16.01026_PP2016-01026DR2_Supplemental_Figure_S4.pdf]

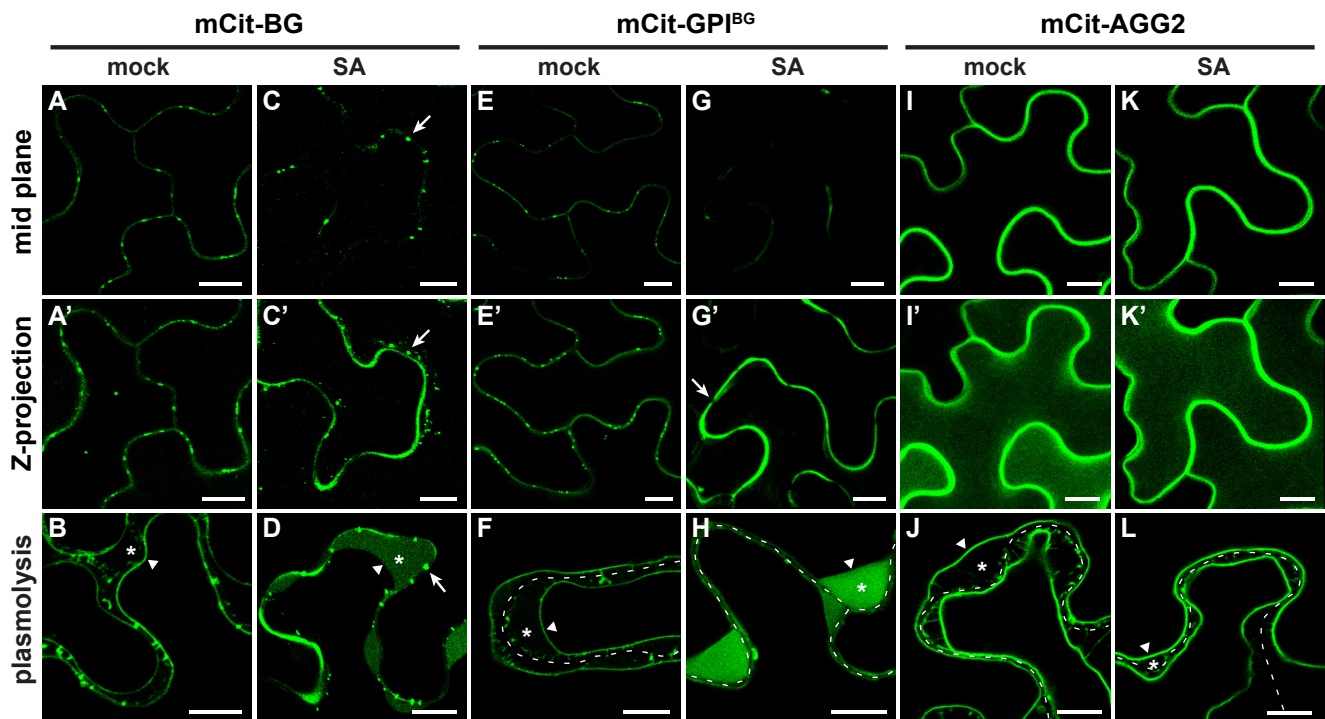

**Supplemental Figure S4.** Effect of salicylic acid (SA) on localization BG<sub>pap</sub>, GPI-anchored mCitrine, and a plasma membrane marker AGG2, in transient expression in *N. benthamiana*. **A-D**, Localization of SP-mCitrine fused to full-length BG<sub>pap</sub> (mCit-BG) in cells treated with water (mock) (A-B) or with SA (C-D). **E-H**, Localization of SP-mCitrine fused to GPI signal of BG<sub>pap</sub> (mCit-GPI<sup>BG</sup>) in mock (E-F) and in SA treated cells (G-H). **I-L**, Localization of mCitrine fused to AGG2 (mCit-AGG2) in mock (I-J) and in SA treated cells (K-L). Top panels show a single confocal slice at the mid plane of the anticlinal wall. Middle panels show Z-projections of several confocal slices across the same cell. Lower panels show localization after plasmolysis. Arrows in C-D indicate the position of Pd foci, and in G' - the position of fluorescence free zone. In plasmolysed cells the white dashed line marks the cell wall, asterisks indicate the apoplastic space formed by the receding protoplast, and triangles indicate the position of plasma membrane. Bars = 10µm.
