# Supplementary material
Source: PubMed Central journal article supplement (PMC5047108)
Supplement: supp_pp.16.01026_PP2016-01026DR2_Supplemental_Figure_S5.pdf [file supp_pp.16.01026_PP2016-01026DR2_Supplemental_Figure_S5.pdf]

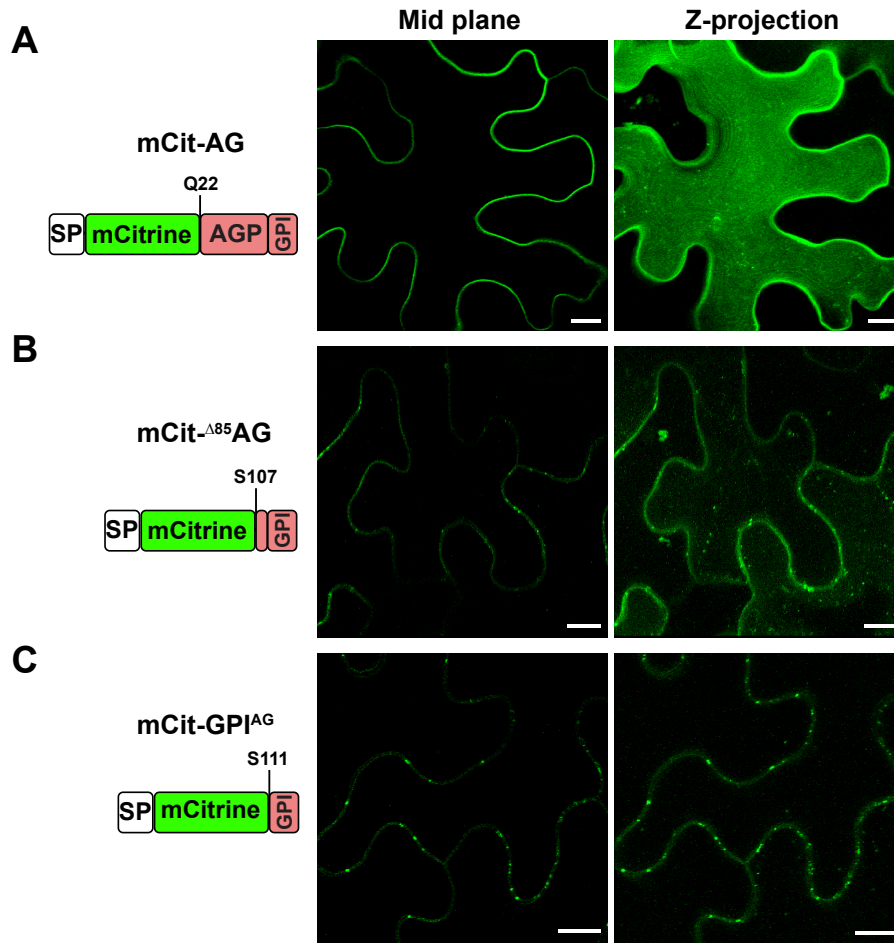

**Supplemental Figure S5.** Localization of SP-mCitrine fused to full-length and truncated AGP4 in transient expression in *N. benthamiana*. **A**, Localization of mCit-AG in which SP-mCitrine was fused to the full-length ectodomain (AGP motif). **B**, Localization of mCit- $\Delta 85$ AG in which the first 85aa of the ectodomain were deleted and SP-mCitrine was fused to S107. **C**, Localization of mCit-GPI<sup>AG</sup> in which the entire ectodomain was deleted and SP-mCitrine was fused to a predicted omega amino acid S111 of the GPI signal. Left panels show a single confocal slice at the mid plane of a cell. Right panels show Z-projections of several confocal slices across the same cell. Bars = 10 $\mu$ m.
