# Supplementary material
Source: PubMed Central journal article supplement (PMC5047108)
Supplement: supp_pp.16.01026_PP2016-01026DR2_Supplemental_Figure_S6.pdf [file supp_pp.16.01026_PP2016-01026DR2_Supplemental_Figure_S6.pdf]

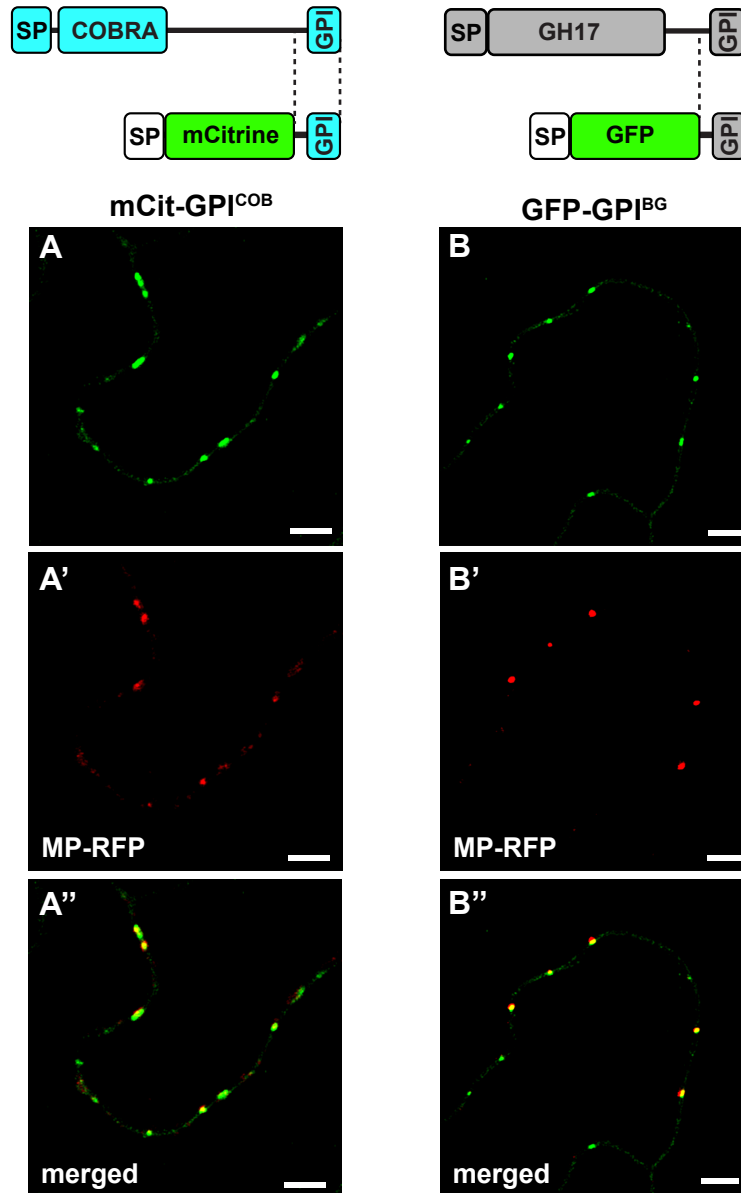

**Supplemental Figure S6.** Plasmodesmal localization of SP-mCitrine fused to GPI signal of Arabidopsis COBRA protein (At5g60920) (mCit-GPI<sup>COBRA</sup>), and SP-GFP fused to GPI signal of BG\_pap (GFP-GPI<sup>BG</sup>) in transient expression in *N. benthamiana*. **A-A''**, Co-localization of mCit-GPI<sup>COBRA</sup> with MP-RFP at Pd. **B-B''**, Co-localization of GFP-GPI<sup>BG</sup> with MP-RFP at Pd. Diagrams of the native proteins and FP fusions are shown above. Bars = 5 μm.
