# Supplementary material
Source: PubMed Central journal article supplement (PMC5047108)
Supplement: supp_pp.16.01026_PP2016-01026DR2_Supplemental_Table_S1.pdf [file supp_pp.16.01026_PP2016-01026DR2_Supplemental_Table_S1.pdf]

1 **Supplemental Table S1.** List of primers used for gene cloning.

| Fusion                 | Construct                                           | Primer name     | Primer sequence (5'-3')                                  |
|------------------------|-----------------------------------------------------|-----------------|----------------------------------------------------------|
| -                      | pTZ57-SP <sup>PR3</sup> -mCitrine                   | SP-Xba-F1       | GCCTCTAGAAACAATGAAGACTAATCTTTTCTCTTTCTCATC               |
|                        |                                                     | SP-Eco-R60      | AGAATTCGGCCGAGGATAATGATAGGAG                             |
| mCit-BG                | pBIN-SP-mCitrine-BG <sub>pap</sub>                  | BGpap-Kpn-F79   | ATGGTACCATCGGCATCAACTATGGCCAGG                           |
|                        |                                                     | BGpap-Not-R1278 | AGCGGCCGCTTACAACCGAAGCTTGATGATGCAAAG                     |
| mCit-BG <sup>ΔC</sup>  | pLN462-SP-mCitrine-GH17 <sup>BG<sub>pap</sub></sup> | B1F-SP1F        | GGGACAAGTTTGTACAAAAAAGCAGGCTTAAACAATGAAGACTAATCTTTTTCTC  |
|                        |                                                     | B2R-PAP-R1044   | GGGACCACTTTGTACAAGAAAGCTGGGTTTAGATCCCAAGTGAGTAAACCGGAG   |
| mCit-GPI <sup>BG</sup> | pBIN-SP-mCitrine-GPI <sup>BG<sub>pap</sub></sup>    | BGpap-Kpn-F1198 | AGGTACCTCCTCCGCCGGGGAAAAG                                |
|                        |                                                     | BGpap-Not-R1278 | AGCGGCCGCTTACAACCGAAGCTTGATGATGCAAAG                     |
| mCit-TM <sup>BG</sup>  | pBIN-SP-mCitrine-TM <sup>BG<sub>pap</sub></sup>     | BGpap-Kpn-F1219 | AGGTACCAGATTCGTTGAGTGTGTGTTGTTC                          |
|                        |                                                     | BGpap-Not-R1278 | AGCGGCCGCTTACAACCGAAGCTTGATGATGCAAAG                     |
| GFP-GPI <sup>BG</sup>  | pBIN-SP-GFP-GPI <sup>BG<sub>pap</sub></sup>         | GFP-Eco-F4      | ATGAATTCGTGAGCAAGGGCGAGGAGCT                             |
|                        |                                                     | BGpap-Not-R1278 | AGCGGCCGCTTACAACCGAAGCTTGATGATGCAAAG                     |
| sec-mCitrine           | pLN462-SP-mCitrine                                  | B1F-SP1F        | GGGACAAGTTTGTACAAAAAAGCAGGCTTAAACAATGAAGACTAATCTTTTTCTC  |
|                        |                                                     | EGFP-R-B2       | GGGACCACTTTGTACAAGAAAGCTGGGTC TTAGTGTACAGCTCGTCCATGC     |
| mCit-AGG2              | pLN462-mCitrine-AGG2                                | B1F-mCit-F1     | GGGACAAGTTTGTACAAAAAAGCAGGCTT AATGGTGAGCAAGGGCGAGGAG     |
|                        |                                                     | AGG2-mCit-R     | GACGAATTGGAGCTACCCGCTTCCTTG TACAGCTCGTCCATGCCG           |
|                        |                                                     | mCit-AGG2-F4    | GGCATGGACGAGCTGTACAAGGAAGCGGG TAGCTCCAATTCGTC            |
|                        |                                                     | B2R-AGG2-R303   | GGGACCACTTTGTACAAGAAAGCTGGGTC TCAAAGAATGGAGCAGCCACATCG   |
| mCit-CB                | pLN462-SP-mCitrine-PDCB1                            | B1F-SP1F        | GGGACAAGTTTGTACAAAAAAGCAGGCTT AAACAATGAAGACTAATCTTTTTCTC |
|                        |                                                     | mCit-PDCB-F58   | TCGGCATGGACGAGCTGTACAAGTCATGGT GTGTGTGTAAGACAGG          |
|                        |                                                     | PDCB-mCit-R     | CTGTCTTACACACACACCATGACTTGTACA                           |

|                         |                                                   |                |                                                               |
|-------------------------|---------------------------------------------------|----------------|---------------------------------------------------------------|
|                         |                                                   |                | GCTCGTCCATGCCGA                                               |
|                         |                                                   | B2R-PDCB-R606  | GGGGACCACTTTGTACAAGAAAGCTGGGTT<br>TTAGAGCATCAGGAAAGAGCAG      |
| mCit-CB <sup>ΔC</sup>   | pLN462-SP-<br>mCitrine-<br>CBM43 <sup>PDCB1</sup> | SP-Xba-F1      | GCCTCTAGAAACAATGAAGACTAATCTTTT<br>TCTCTTTCTCATC               |
|                         |                                                   | PDCB-mCit-R    | CTGTCTTACACACACACCATGACTTGTACA<br>GCTCGTCCATGCCGA             |
|                         |                                                   | mCit-PDCB-F58  | TCGGCATGGACGAGCTGTACAAGTCATGGT<br>GTGTGTGTAAGACAGG            |
|                         |                                                   | PDCB-Not-R312  | AGCGGCCGCTTAAAAGGCACAACCTGTATA<br>ACTG                        |
| mCit-GPI <sup>CB</sup>  | pLN462-SP-<br>mCitrine-GPI <sup>PDCB1</sup>       | B1F-SP1F       | GGGGACAAGTTTGTACAAAAAAGCAGGCTT<br>AAACAATGAAGACTAATCTTTTTTCTC |
|                         |                                                   | mCit-PDCB-F458 | TCGGCATGGACGAGCTGTACAAGGGAAATA<br>GCACAGGAGGCACC              |
|                         |                                                   | PDCB-F458-mCit | GGTGCCTCCTGTGCTATTTCCCTTGTACAGC<br>TCGTCCATGCCGA              |
|                         |                                                   | B2R-PDCB-R606  | GGGGACCACTTTGTACAAGAAAGCTGGGTT<br>TTAGAGCATCAGGAAAGAGCAG      |
| mCit-AG                 | pBIN-SP-mCitrine-<br>AGP4                         | AGP-Kpn-F64    | AGGTACCCAAGCCCCTGCTCCTACTCC                                   |
|                         |                                                   | AGP-Not-R408   | AGCGGCCGCTCAAGCCAAAACGGCGGCGT<br>AC                           |
| mCit-GPI <sup>AG</sup>  | pBIN-SP-mCitrine-<br>GPI <sup>AGP4</sup>          | AGP-Kpn-F331   | AGGTACCAGCGCCGATTCTCCAACAAG                                   |
|                         |                                                   | AGP-Not-R408   | AGCGGCCGCTCAAGCCAAAACGGCGGCGT<br>AC                           |
| mCit- <sup>Δ85</sup> AG | pBIN-SP-mCitrine-<br><sup>Δ85</sup> AGP4          | AGP-Kpn-F319   | AGGTACCTCCCCTGCCCAAGCGCC                                      |
|                         |                                                   | AGP-Not-R408   | AGCGGCCGCTCAAGCCAAAACGGCGGCGT<br>AC                           |
| mCit-TM <sup>AG</sup>   | pBIN-SP-mCitrine-<br>TM <sup>AGP4</sup>           | AGP-Kpn-F349   | AGGTACCAAGGCTTTCTTCGCCGGAACC                                  |
|                         |                                                   | AGP-Not-R408   | AGCGGCCGCTCAAGCCAAAACGGCGGCGT<br>AC                           |
| mCit-LT                 | pLN462-SP-<br>mCitrine-LTPG1                      | B1F-SP1F       | GGGGACAAGTTTGTACAAAAAAGCAGGCTT<br>AAACAATGAAGACTAATCTTTTTTCTC |
|                         |                                                   | mCit-LTPG-F97  | TCGGCATGGACGAGCTGTACAAGGATGAAT<br>GCAACCAGGATTTTC             |
|                         |                                                   | LTPG97-mCit-R  | TTGAAAATCCTGGTTGCATTTCATCCTTGTAC<br>AGCTCGTCCATGCCGA          |
|                         |                                                   | B2R-LTPG-R582  | GGGGACCACTTTGTACAAGAAAGCTGGGTT<br>TTACATCCCTAATGTGACATGTC     |
| mCit-GPI <sup>LT</sup>  | pLN462-SP-<br>mCitrine-GPI <sup>LTPG1</sup>       | B1F-SP1F       | GGGGACAAGTTTGTACAAAAAAGCAGGCTT<br>AAACAATGAAGACTAATCTTTTTTCTC |
|                         |                                                   | mCit-LTPG-F475 | TCGGCATGGACGAGCTGTACAAGGGATCAG<br>CTTCAGCAAAGGATG             |
|                         |                                                   | LTPG475-mCit-R | ACCATCCTTTGCTGAAGCTGATCCCTTGTAC<br>AGCTCGTCCATGCCGA           |
|                         |                                                   | B2R-LTPG-R582  | GGGGACCACTTTGTACAAGAAAGCTGGGTT<br>TTACATCCCTAATGTGACATGTC     |

|                                                |                                                                       |                         |                                                              |
|------------------------------------------------|-----------------------------------------------------------------------|-------------------------|--------------------------------------------------------------|
| mCit-AG <sup>ΔGPI</sup> -<br>GPI <sup>CB</sup> | pLN462-SP-<br>mCitrine-AGP4 <sup>ΔGPI</sup> -<br>GPI <sup>PDCB1</sup> | B1F-AGP-F1              | GGGGACAAGTTTGTACAAAAAAGCAGGCTT<br>AATGGGTTCCAAGATTGTCCAAG    |
|                                                |                                                                       | AGP330-<br>GPIpdcB700   | CCTTCAGATGCATCCCCTGCCCCATCAAGC<br>AAATTGTTTCATCTGC           |
|                                                |                                                                       | GPIpdcB700-AGP-<br>R330 | GCAGATGAACAATTTGCTTGATGGGGCAGG<br>GGATGCATCTGA               |
|                                                |                                                                       | B2R-BGpap-R1278         | GGGGACCACTTTGTACAAGAAAGCTGGGTT<br>TTACAACCGAAGCTTGATGATGC    |
| mCit-AG <sup>ΔGPI</sup> -CB                    | pLN462-SP-<br>mCitrine-AGP4 <sup>ΔGPI</sup> -<br>PDCB1                | B1F-AGP-F1              | GGGGACAAGTTTGTACAAAAAAGCAGGCTT<br>AATGGGTTCCAAGATTGTCCAAG    |
|                                                |                                                                       | AGP330-PDCB-F58         | CTTCAGATGCATCCCCTGCCCCATCATGGTG<br>TGTGTGTAAGACAGG           |
|                                                |                                                                       | PDCB58-AGP-R330         | CCTGTCTTACACACACCCATGATGGGGCA<br>GGGGATGCATCTG               |
|                                                |                                                                       | B2R-PDCB-R606           | GGGGACCACTTTGTACAAGAAAGCTGGGTT<br>TTAGAGCATCAGGAAAGAGCAG     |
| mCit-CB <sup>ΔGPI</sup> -AG                    | pLN462-SP-<br>mCitrine-<br>PDCB1 <sup>ΔGPI</sup> -AGP4                | B1F-SP1F                | GGGGACAAGTTTGTACAAAAAAGCAGGCTT<br>AAACAATGAAGACTAATCTTTTTCTC |
|                                                |                                                                       | PDCB513-AGP-F64         | ATTAACCCGGATTACACGACAGACCAAGCC<br>CCTGCTCCTACTCC             |
|                                                |                                                                       | AGP64-PDCB-R513         | GTGGGAGTAGGAGCAGGGGCTTGGTCTGTC<br>GTGTAATCCGGGTTAATC         |
|                                                |                                                                       | B2R-GPIAGP              | GGGGACCACTTTGTACAAGAAAGCTGGGTT<br>TCAAGCCAAAACGGCGGCCTAC     |
| mCit-GPI <sup>COBRA</sup>                      | pBIN-SP-mCitrine-<br>GPI <sup>COBRA</sup>                             | COB-Kpn-F1244           | AGGTACCGGAGACAATTGCGTCATGCCTC                                |
|                                                |                                                                       | COB-Not-R1371           | ATGCGGCCGCTTAGGCAGAGAAGAAGAAA<br>AAGACAAG                    |

2
